# Supplementary material for: Transcriptome-wide&nbsp;Development and Utilization of Novel Intron-length&nbsp;Polymorphic (ILP) Markers in&nbsp;Common Vetch (Vicia Sativa Subsp. Sativa)
Source: Research Square preprint supplement (doi:10.21203/rs.3.rs-158950/v1), 2021-02-08
Supplement: Supplementary file 1 [file 80bc218e40e687d0dcf2a532.docx]

| **Table S1.** List of common vetch accessions used for genetic diversity in this study. | | | | | |
| --- | --- | --- | --- | --- | --- |
| Serial no. | Name | PI Number | Species | Country of origin | Type |
| 1 | TYESISSKAYA | PI 263181 | *Vicia sativa* L. | Former Soviet Union | Cultivar |
| 2 | VILKOVISHSKAYA | PI 263187 | *Vicia sativa* L. | Former Soviet Union | Cultivar |
| 3 | BELOCERKOVSKAJA 199 | PI 406328 | *Vicia sativa* L. | Former Soviet Union | Cultivar |
| 4 | STANISLAVSKAYA | PI 263182 | *Vicia sativa* L. | Former Soviet Union | Cultivar |
| 5 | KOMARICHSKAYA | PI 263180 | *Vicia sativa* L. | Former Soviet Union | Cultivar |
| 6 | BLANCHEGRAIN | PI 293298 | *Vicia sativa* L. | France | Cultivar |
| 7 | CAROLE | PI 628305 | *Vicia sativa* L. | France | Cultivar |
| 8 | CAROLINE | PI 628306 | *Vicia sativa* L. | France | Cultivar |
| 9 | SEPTIMANE | PI 293300 | *Vicia sativa* L. | France | Cultivar |
| 10 | BLANCHEFLEUR | PI 413768 | *Vicia sativa* L. | France | Cultivar |
| 11 | WARRIOR | PI 599337 | *Vicia sativa* L. | United States | Cultivar |
| 12 | NOVA II | PI 600820 | *Vicia sativa* L. | United States | Cultivar |
| 13 | VANGUARD | PI 600821 | *Vicia sativa* L. | United States | Cultivar |
| 14 | CAHABA WHITE | PI 600818 | *Vicia sativa* L. | United States | Cultivar |
| 15 | CHARKOVSZKAJA N.134 | PI 289495 | *Vicia sativa* L. | Hungary | Cultivar |
| 16 | OSZTRAK TAJFAJTA | PI 289503 | *Vicia sativa* L. | Hungary | Cultivar |
| 17 | STRZELECHE RDZOWA | PI 289513 | *Vicia sativa* L. | Hungary | Cultivar |
| 18 | RUGENER | PI 289499 | *Vicia sativa* L. | Hungary | Cultivar |
| 19 | LGOVSZKAJA 31-292 | PI 289497 | *Vicia sativa* L. | Hungary | Cultivar |
| 20 | NASU NO. 5 | PI 286470 | *Vicia sativa* L. | Japan | Cultivar |
| 21 | Lanjian no.1 | GSS011 | *Vicia sativa* L. | China | Cultivar |
| 22 | Lanjian no.2 | 482 | *Vicia sativa* L. | China | Cultivar |
| 23 | Lanjian no.3 | 441 | *Vicia sativa* L. | China | Cultivar |
| 24 | Sujian no.5 | CF005904 | *Vicia sativa* L. | China | Cultivar |
| 25 | Sujian no.4 | CF005910 | *Vicia sativa* L. | China | Cultivar |
| 26 | Sujian no.3 (Huaiyin) | CF005913 | *Vicia sativa* L. | China | Cultivar |
| 27 | Sujian no.3 (Ning) | CF005912 | *Vicia sativa* L. | China | Cultivar |
| 28 | 6625 (Dajia) | CF030070 | *Vicia sativa* L. | China | Cultivar |
| 29 | 6625 | CF005914 | *Vicia sativa* L. | China | Cultivar |
| 30 | Zhongmu324 | CF005908 | *Vicia sativa* L. | China | Cultivar |
